# Supplementary material for: Enhancing local action planning through quantitative flood risk analysis: a case study in Spain
Source: Copernicus journal article supplement (doi:10.5194/nhess-2016-65), 2016-03-01
Supplement: Supplementary file 1 [file nhess-2016-65-supplement.pdf]

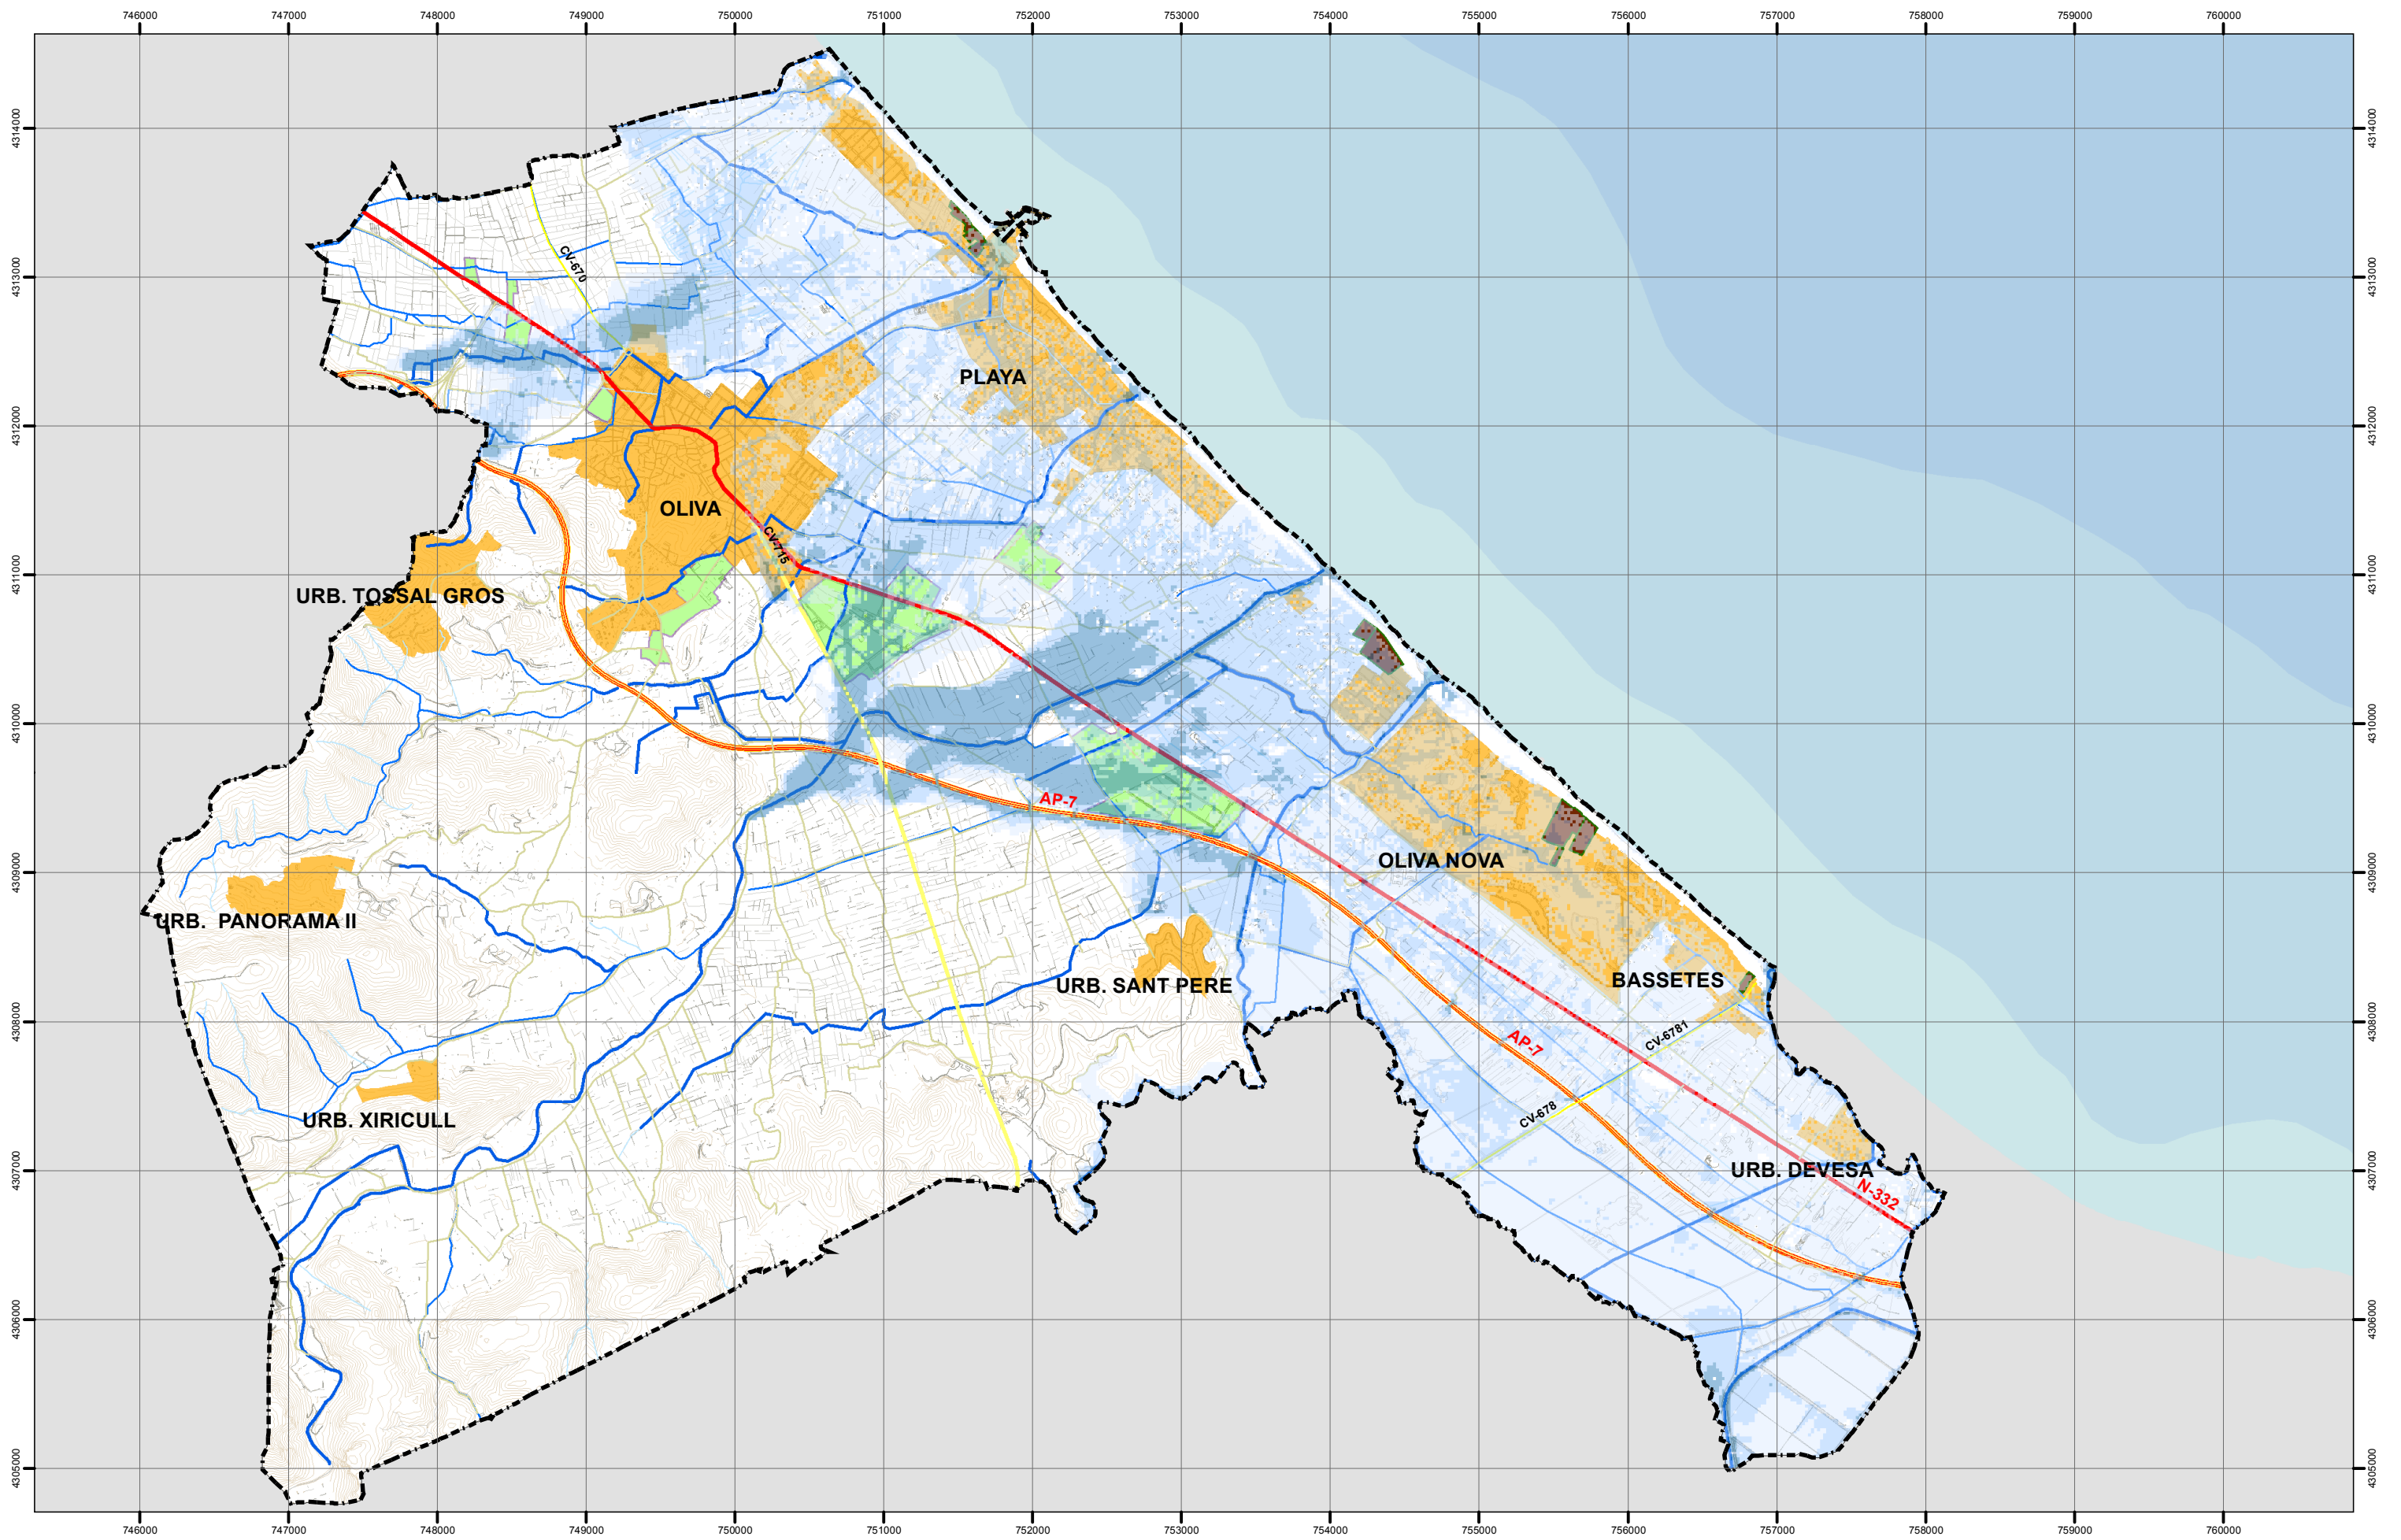

**Authors:**  
 J. T. Castillo-Rodríguez  
 I. Escuder-Bueno  
 S. Perales-Momparler  
 J.R. Porta Sancho

**Legend:**

|                  |                 |               |           |          |
|------------------|-----------------|---------------|-----------|----------|
| Limit Urban Area | Urbanized areas | River courses | Highway   | 0 - 0.01 |
| Industrial area  | 1: Main courses | National      | 0.01- 0.3 |          |
| Campsites        | 2: Secondary    | Regional      | 0.3 - 0.8 |          |
|                  | 3: Minor        | Local         | > 0.8     |          |
|                  | 4: Other        | Others        |           |          |

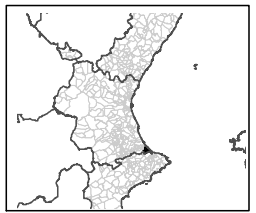

**Map:** 01  
**Date:** Feb. 2016  
**Scale (A3 size):**  
 1:40,000

**Title:** Flood hazard map (Current Situation)  
 500-yr event

Scale bar: 0, 375, 750, 1,500, 2,250, 3,000 m  
 ETRS89-GRS80  
 UTM H30

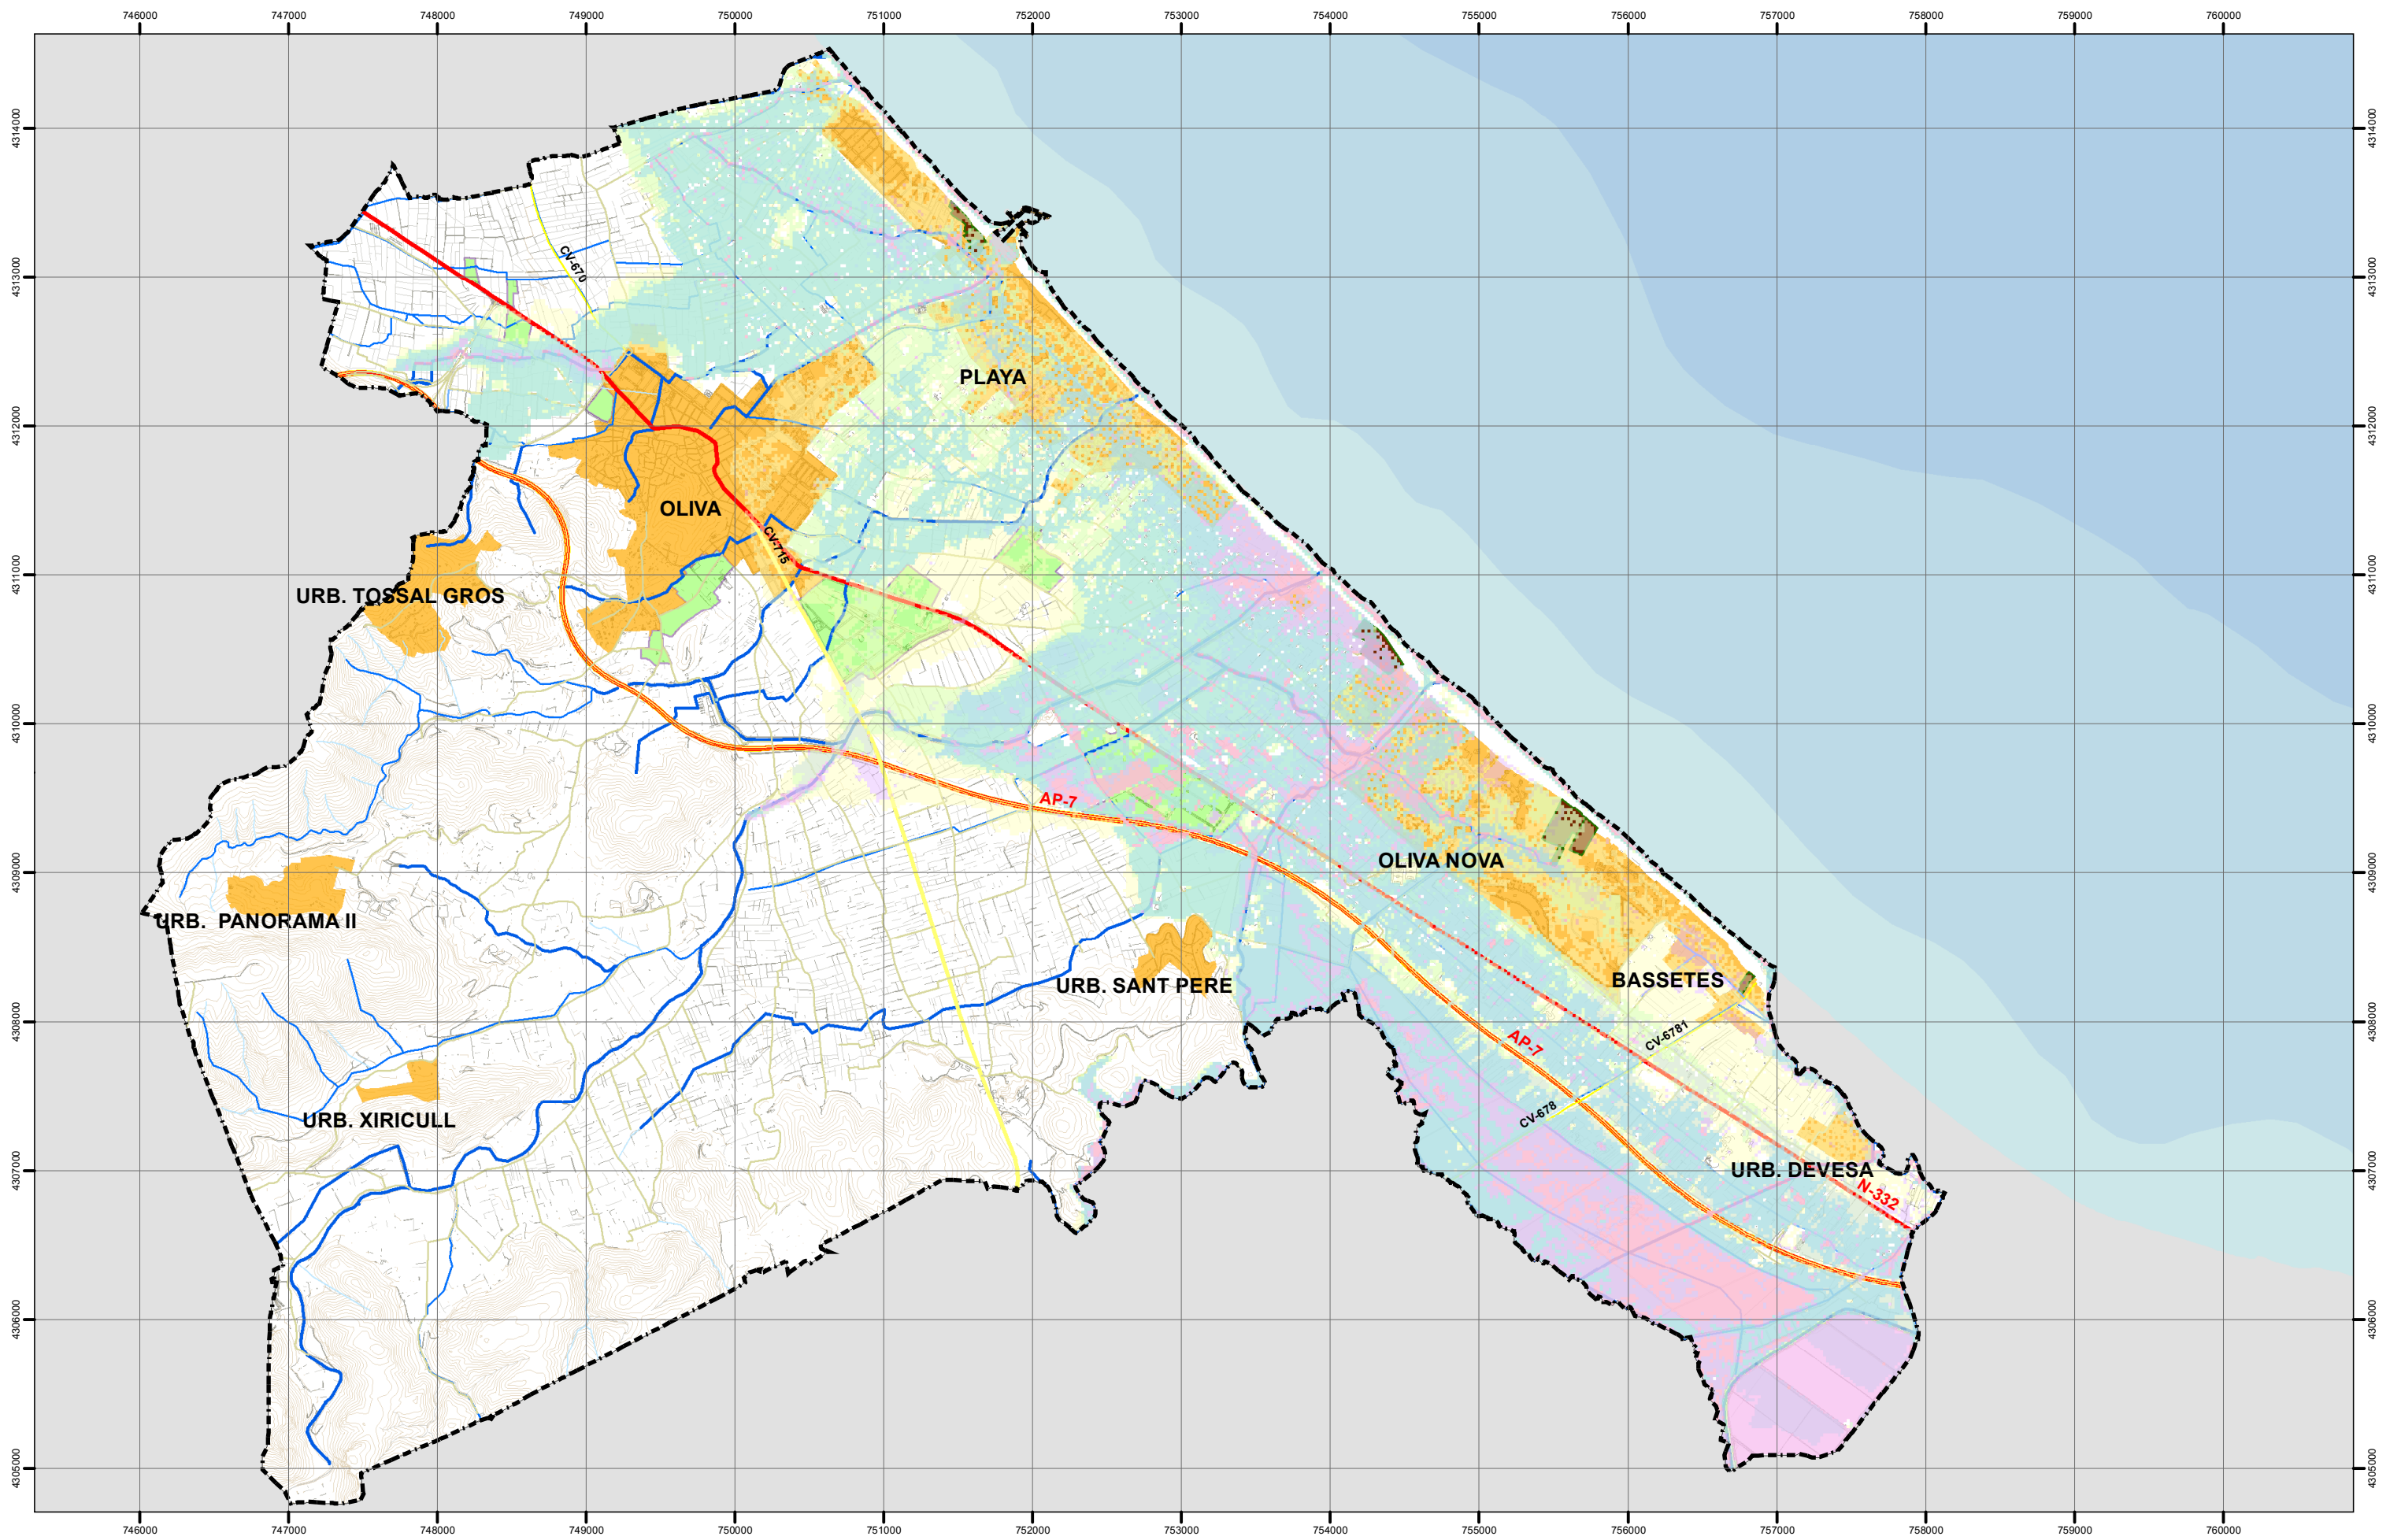

**Authors:**  
 J. T. Castillo-Rodríguez  
 I. Escuder-Bueno  
 S. Perales-Mompalmer  
 J.R. Porta Sancho

**Legend:**

|                  |                 |               |         |        |        |        |
|------------------|-----------------|---------------|---------|--------|--------|--------|
| Limit Urban Area | Urbanized areas | River courses | Highway | CS_NP1 | CS_NP3 | CS_NP5 |
| Industrial area  | 1: Main courses | National      | CS_NP2  | CS_NP4 | CS_NP6 |        |
| Campsites        | 2: Secondary    | Regional      | Local   | Others |        |        |
|                  | 3: Minor        | Others        |         |        |        |        |
|                  | 4: Other        |               |         |        |        |        |



**Map:** 02  
**Date:** Feb. 2016  
**Scale (A3 size):**  
 1:40,000

**Title:** Hazard level map (Current situation)

0 375 750 1,500 2,250 3,000 m

ETRS89-GRS80  
 UTM H30

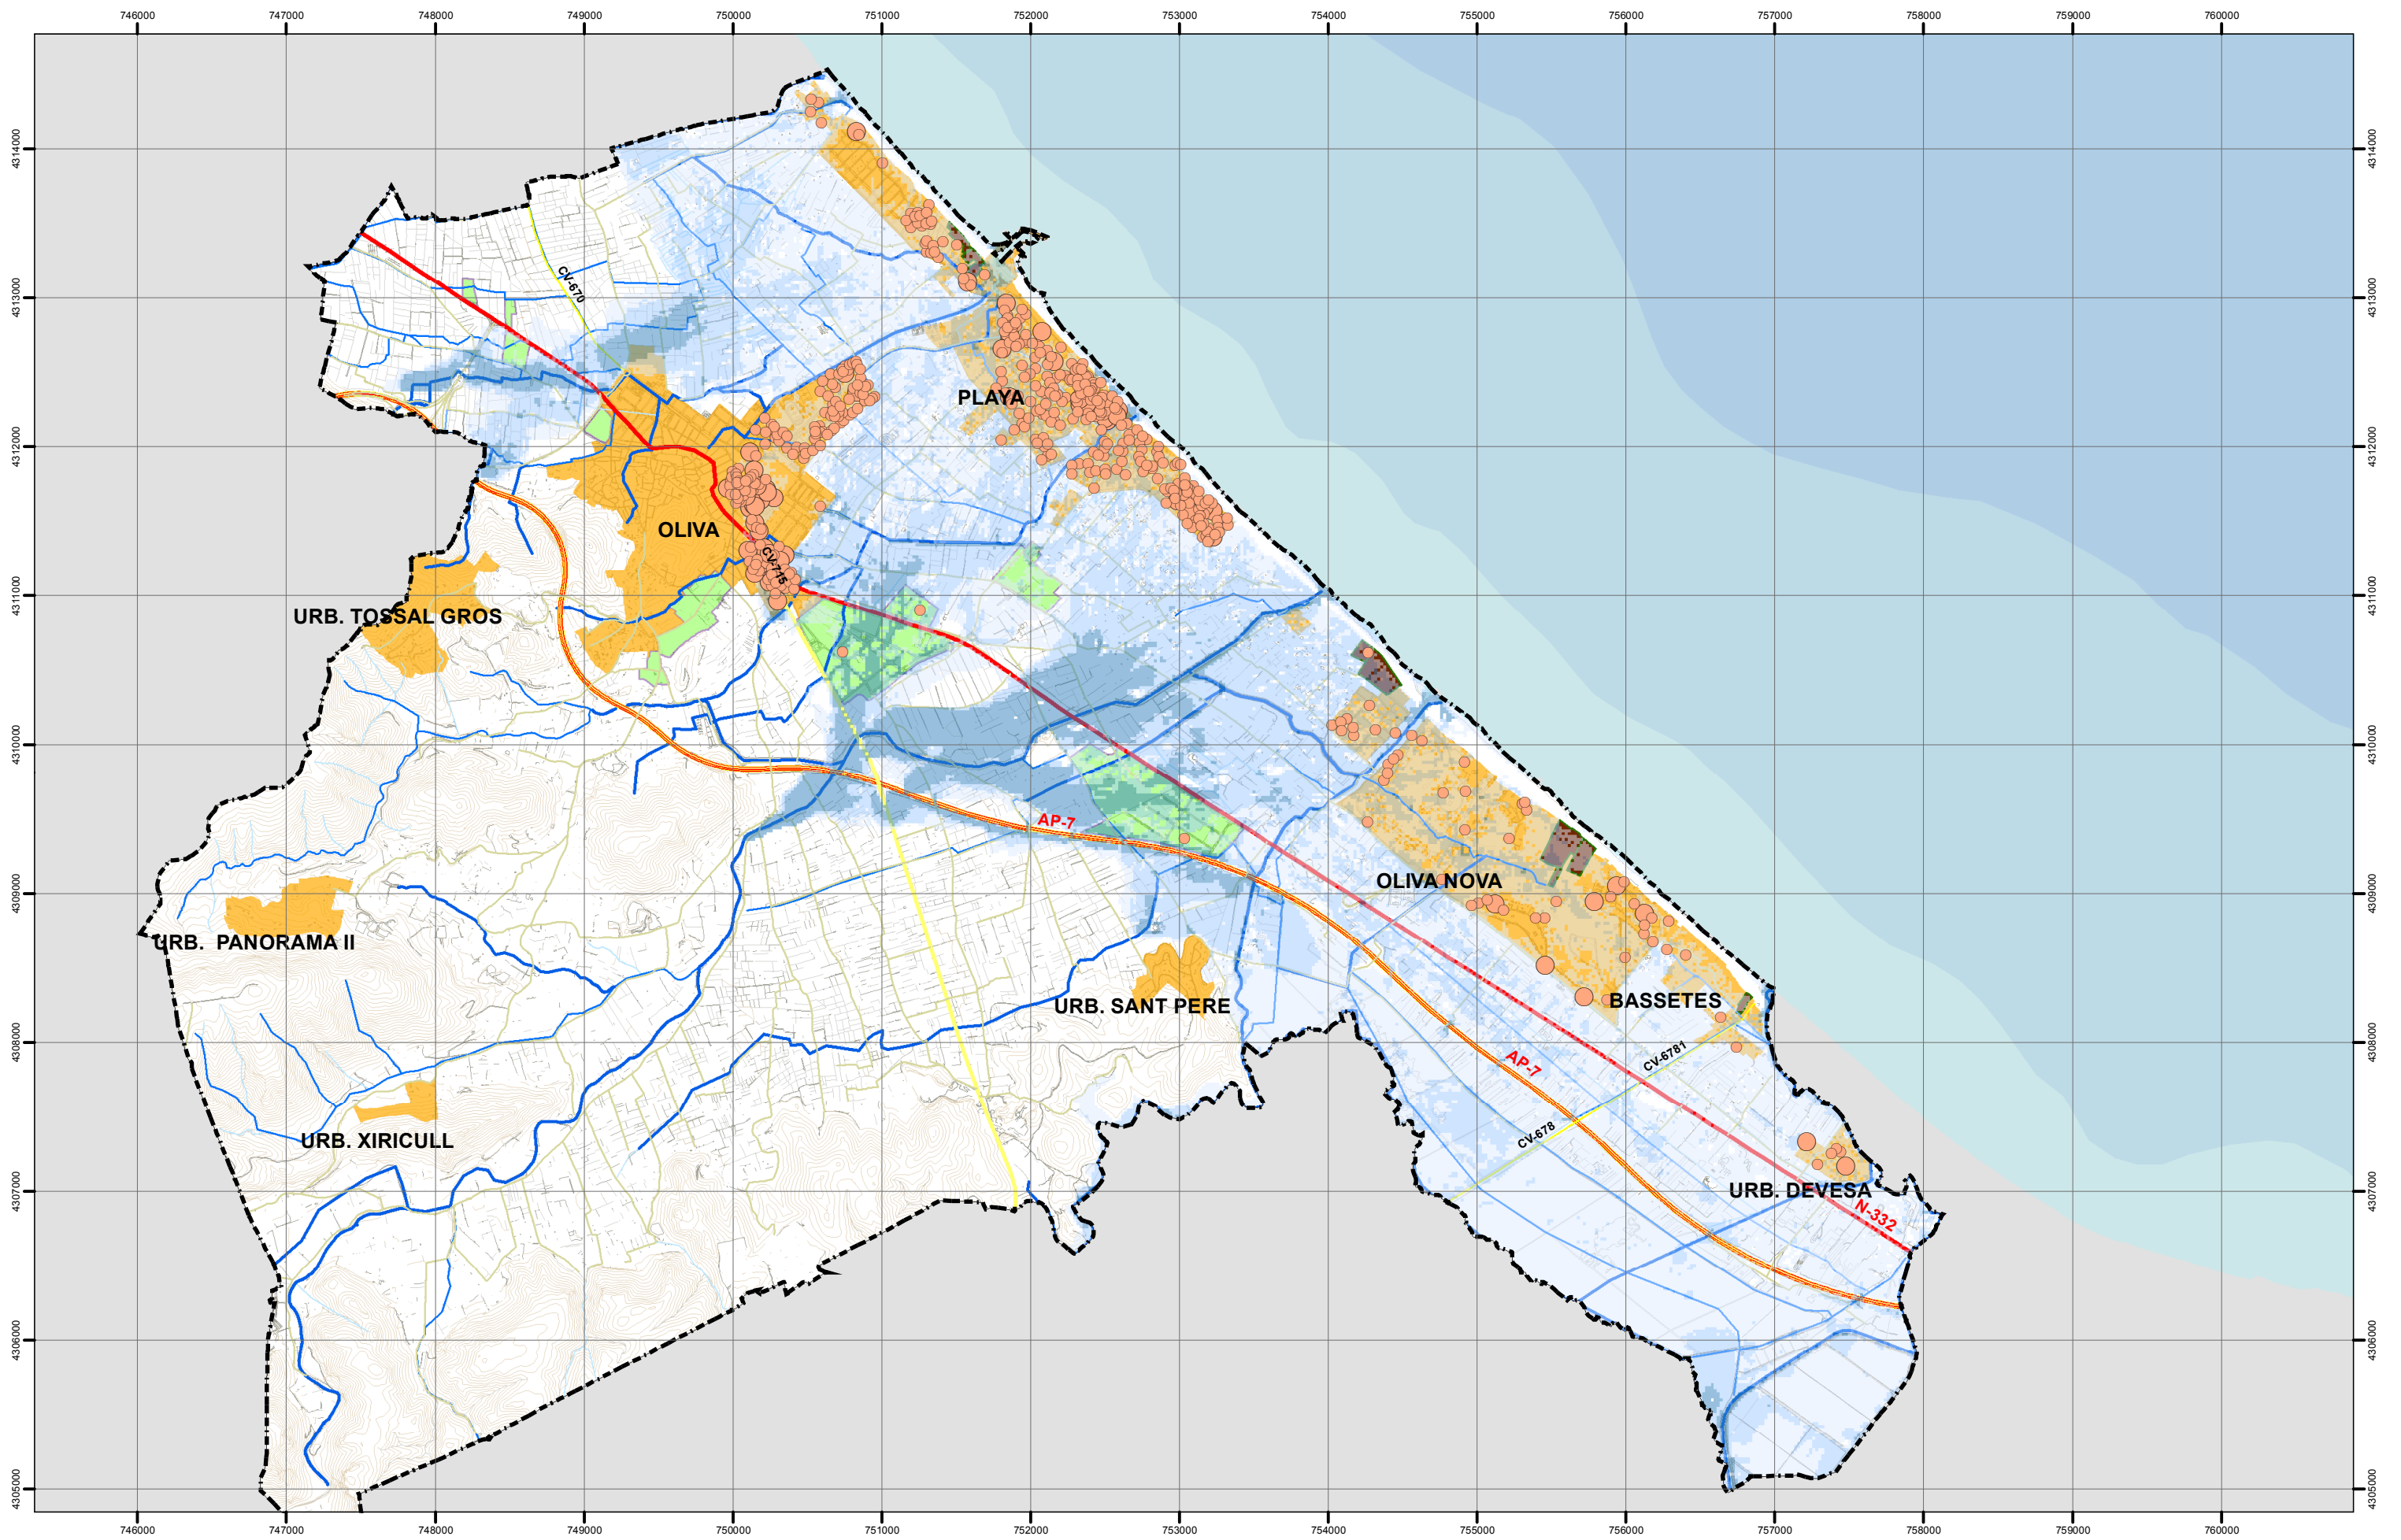

**Authors:**  
 J. T. Castillo-Rodríguez  
 I. Escuder-Bueno  
 S. Perales-Momparler  
 J.R. Porta Sancho

**Legend:**

|                  |                 |                      |         |                            |
|------------------|-----------------|----------------------|---------|----------------------------|
| Limit Urban Area | Urbanized areas | <b>River courses</b> | Highway | <b>Affected Population</b> |
| Industrial area  | 1: Main courses | National             | <1      | <10                        |
| Campsites        | 2: Secondary    | Regional             | <100    | >100                       |
|                  | 3: Minor        | Local                |         |                            |
|                  | 4: Other        | Others               |         |                            |



**Map:** 03  
**Date:** Feb. 2016  
**Scale (A3 size):**  
 1:40,000

**Title:** Affected population (Current situation) 500-yr event

0 375 750 1,500 2,250 3,000 m  
 ETRS89-GRS80  
 UTM H30
